# Supplementary material for: En Face Optical Coherence Tomography Imaging Ellipsoid Zone Regeneration in Laser-Induced and Solar Maculopathies
Source: Hindawi journal article supplement (doi:10.1155/2019/3849871), 2019-11-21
Supplement: f1 [file 3849871.f1.pdf]

## Supplementary file

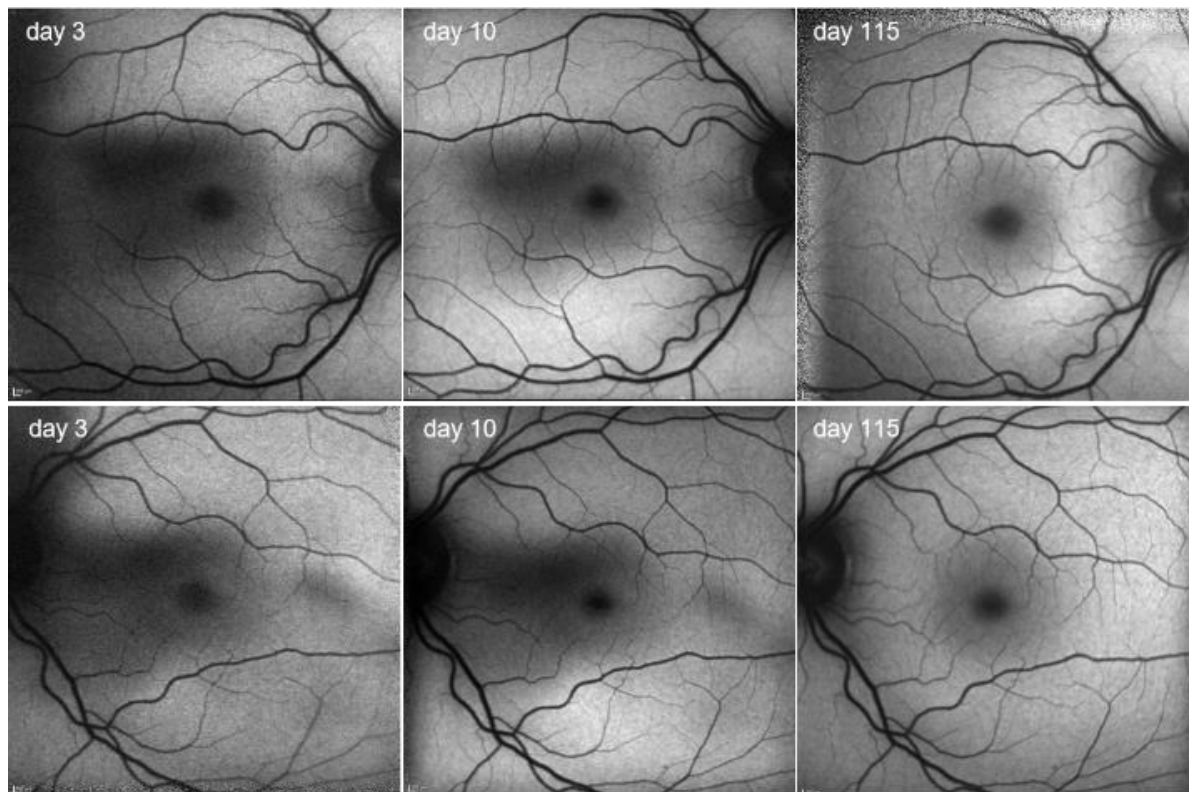

Figure 6: Fundus autofluorescence images of patient 4 obtained with a confocal scanning laser ophthalmoscope (cSLO) demonstrating substantially diminishes autofluorescence in the parafoveal areas in both eyes on day 3 after the incident. Images on day 115 show apparently normal autofluorescence (excitation wavelength of 488nm and an emission filter of 500nm was used; macular pigment markedly reduces autofluorescence and therefore the foveal aspects cannot be evaluated).
